# Supplementary material for: Molecular aspects of glycine clustering and phase separation in an aqueous solution during anti-solvent crystallization
Source: Royal Society of Chemistry journal article supplement (doi:10.1039/d0ce00542h), 2020-01-01
Supplement: d0ce00542h1.pdf [file d0ce00542h1.pdf]

Table S1 Enthalpy of solvation of glycine aqueous solution as bulk with different ethanol concentration

| Ethanol mole fraction [-] | Enthalpy of solvation [kJ mol <sup>-1</sup> ] |
|---------------------------|-----------------------------------------------|
| 0.0052                    | -121.45                                       |
| 0.0213                    | -118.99                                       |
| 0.0294                    | -118.37                                       |
| 0.0466                    | -116.86                                       |
| 0.0773                    | -115.27                                       |
| 0.1154                    | -115.10                                       |
| 0.2268                    | -115.77                                       |

Table S2 List of hydrogen bond (N-H...O<sub>g</sub>) of glycine alpha and gamma polymorph

| polymorph | Distance H...O <sub>g</sub> [Å] | Distance N...O <sub>g</sub> [Å] | Angle of N-H...O <sub>g</sub> [degree] |
|-----------|---------------------------------|---------------------------------|----------------------------------------|
| Alpha     | 2.413                           | 2.953                           | 115.74                                 |
|           | 2.186                           | 3.080                           | 156.29                                 |
|           | 1.794                           | 2.778                           | 167.51                                 |
|           | 1.888                           | 2.854                           | 168.7                                  |
| Gamma     | 1.941                           | 2.807                           | 159.89                                 |
|           | 1.934                           | 2.802                           | 163.29                                 |
|           | 2.121                           | 2.983                           | 173.5                                  |

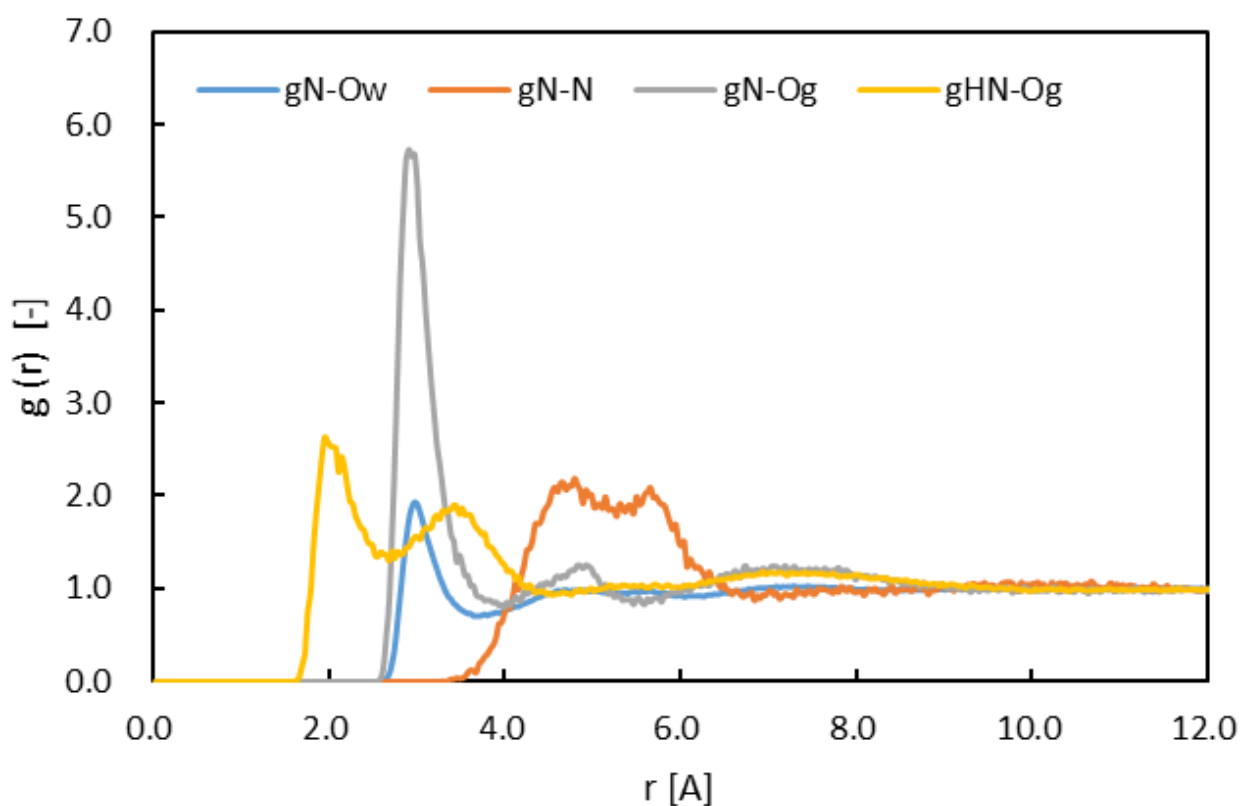

Fig. S1 Radial distribution function,  $g(r)$  of N- $O_w$  (oxygen of water), N-N, N- $O_g$  (oxygen of glycine) and HN- $O_g$  (hydrogen bonded to N) of glycine zwitterion aqueous solution of at  $C = 3.33 \text{ mol kg}^{-1}$ .

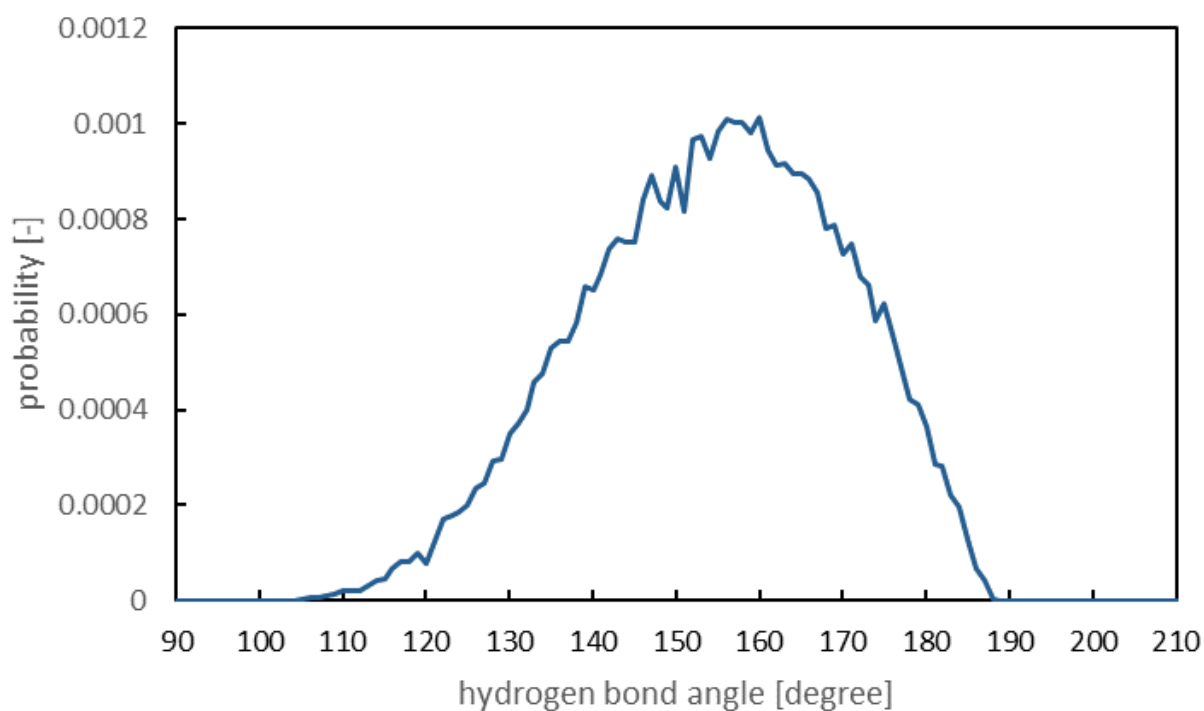

Fig. S2 Angle spectra of hydrogen bond (HN-N...O<sub>g</sub>) of glycine-glycine cluster in  $C = 3.33 \text{ mol kg}^{-1}$  glycine aqueous solution as bulk

a)

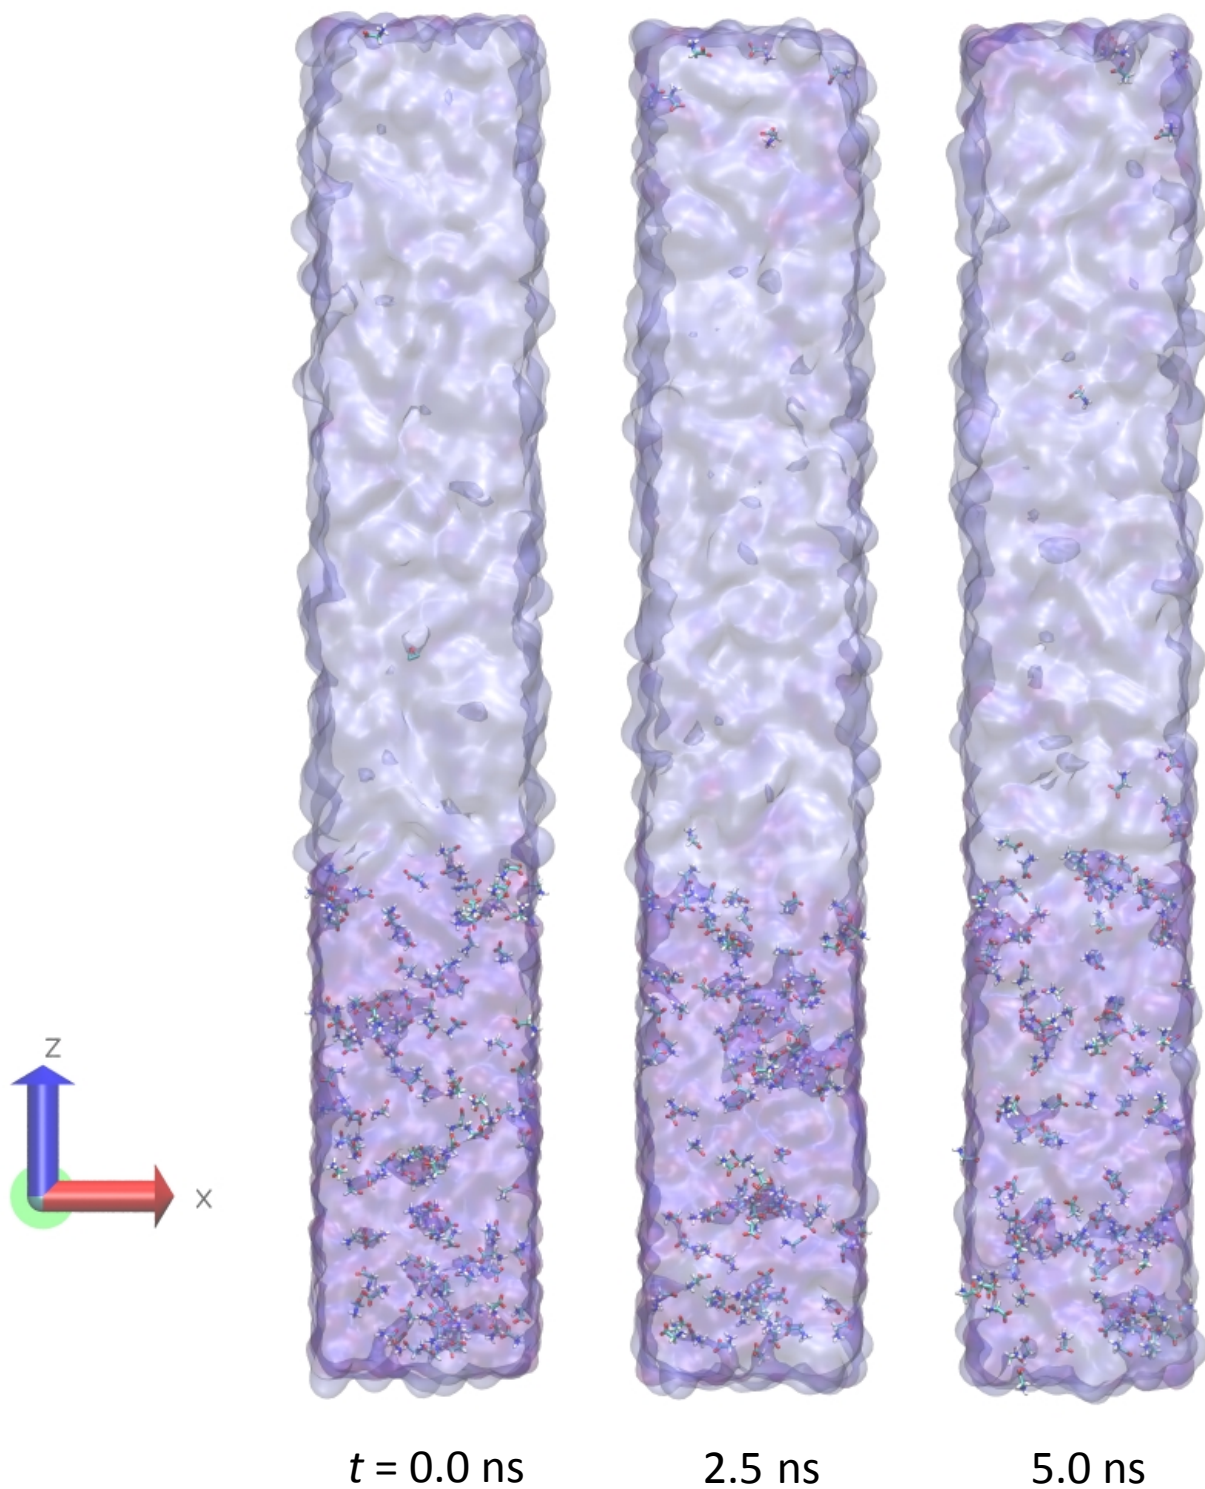

Fig. S3 Snapshots of glycine aqueous solution and ethanol system at  $t = 0.0, 2.5$  and  $5.0 \text{ ns}$  at  $C = 2.94 \text{ mol kg}^{-1}$ .

c)

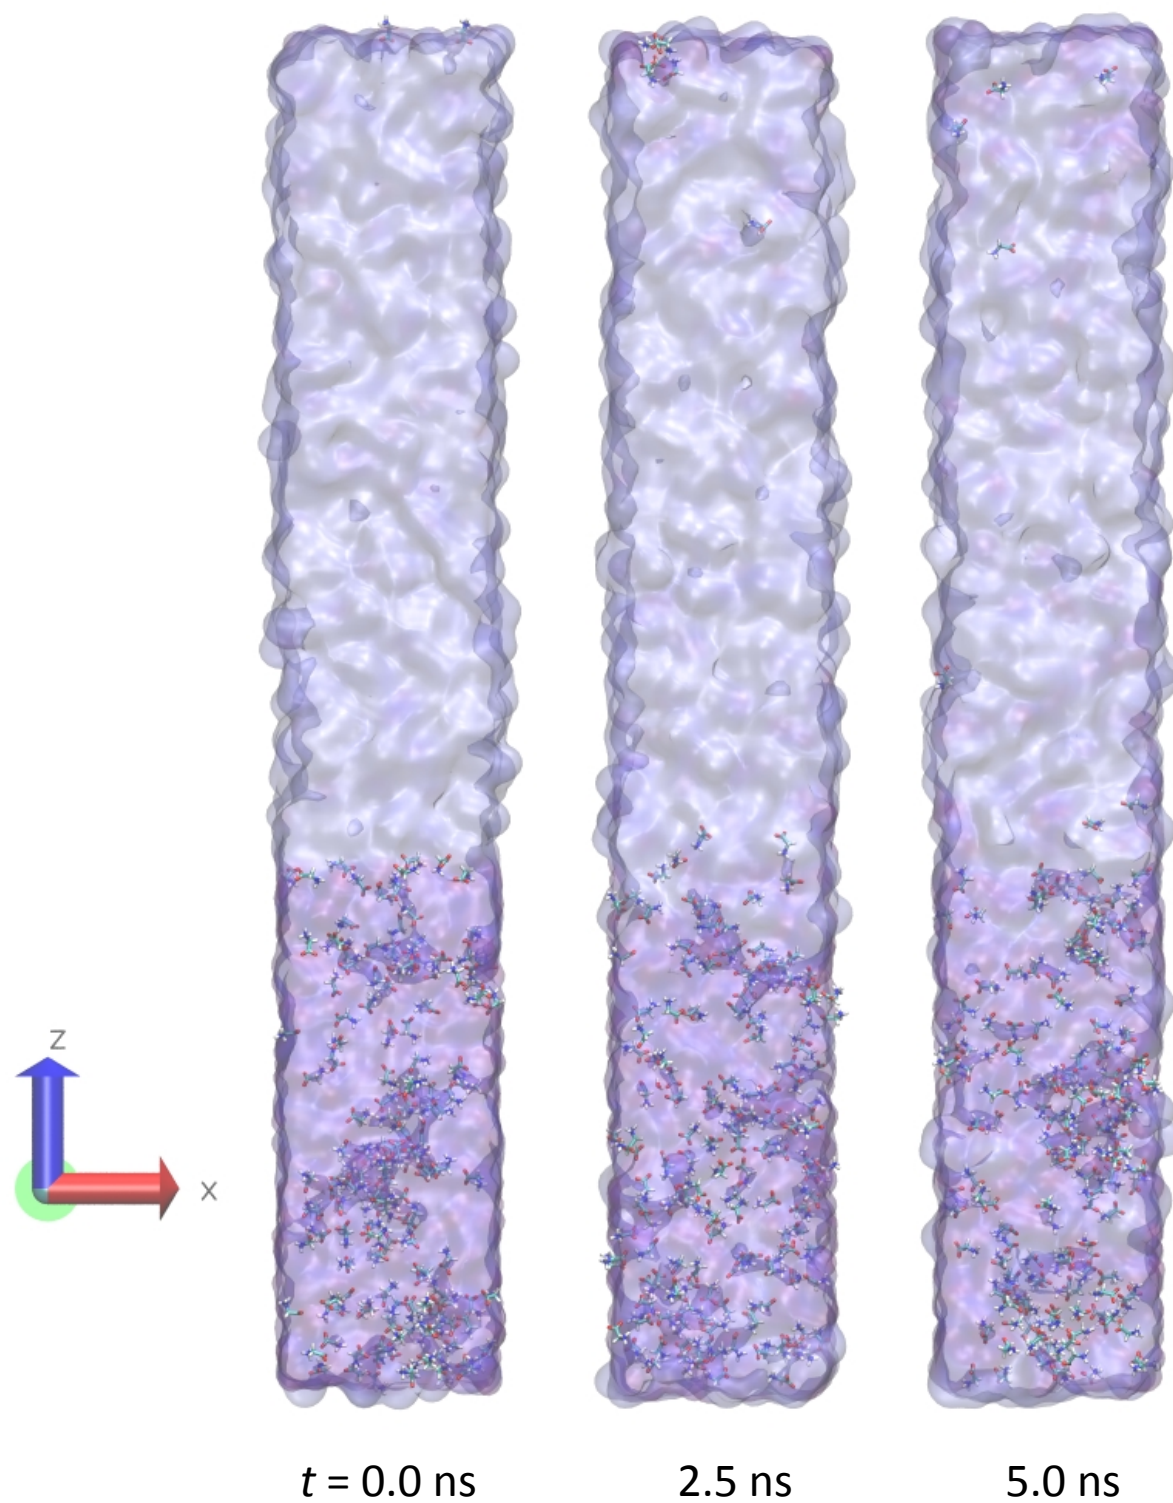

Fig. S4 Snapshots of glycine aqueous solution and ethanol system at  $t = 0.0, 2.5$  and  $5.0 \text{ ns}$  at  $C = 3.72 \text{ mol kg}^{-1}$ .

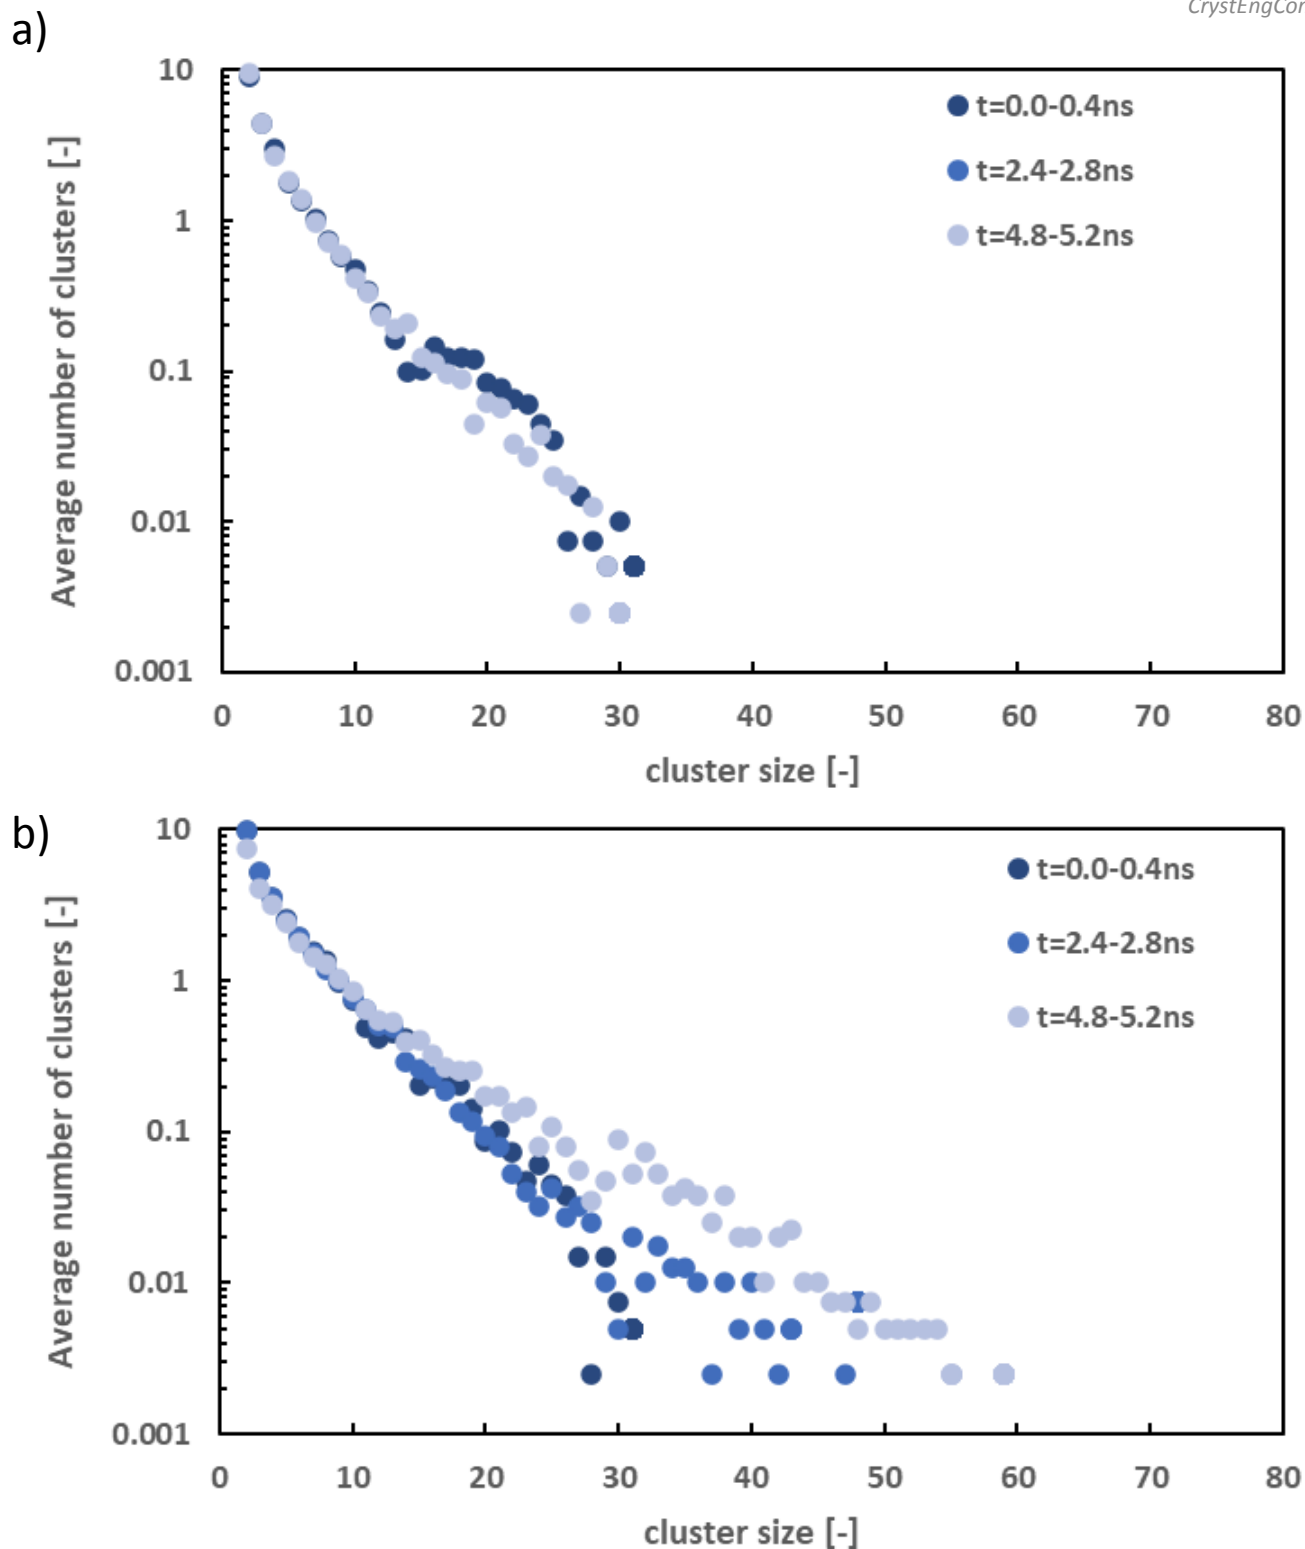

Fig. S5 clustering behavior of the system: semilog histograms of the average number observed versus cluster size at a)  $C = 2.94 \text{ mol kg}^{-1}$  and b)  $C = 3.72 \text{ mol kg}^{-1}$ .



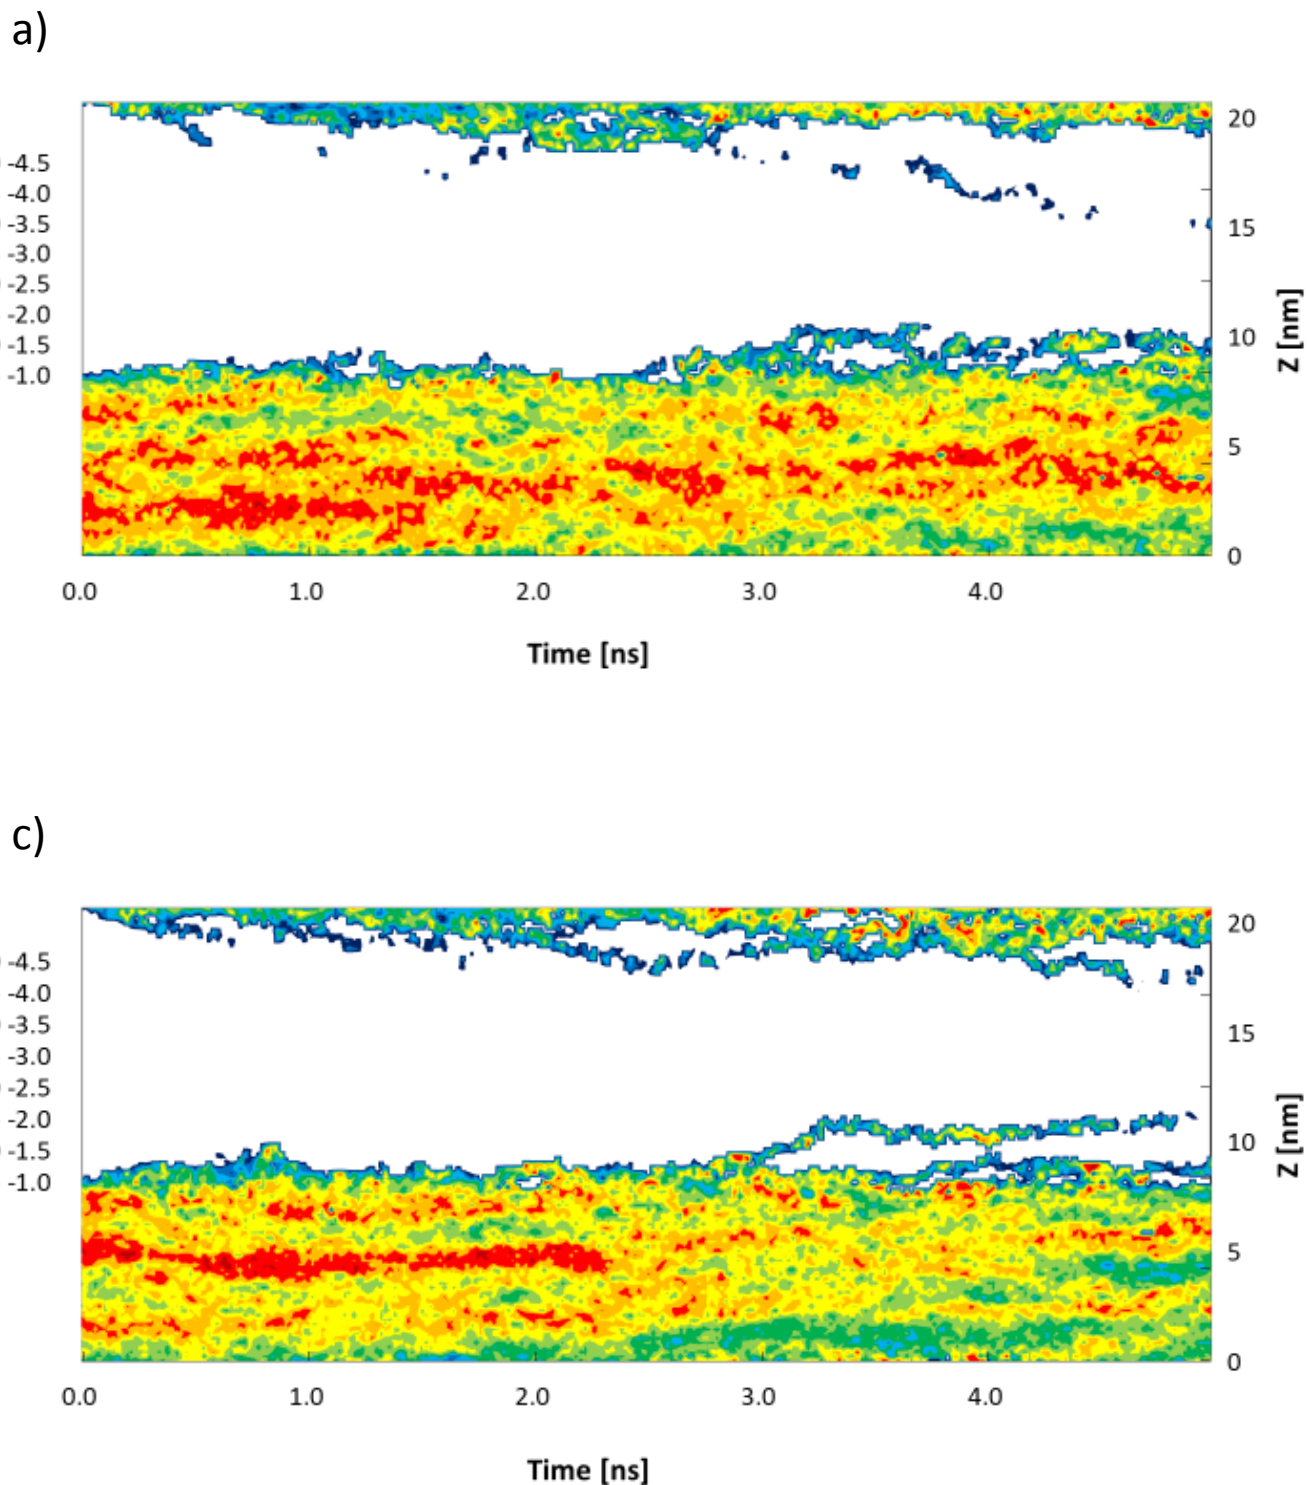

Fig. S6 Coordination number of  $N-O_w$  vs. time ( $t = 0.0-5.0$  ns) at a)  $C = 2.94$  and b)  $C = 3.72$  mol  $kg^{-1}$  of glycine aqueous solution.

a)

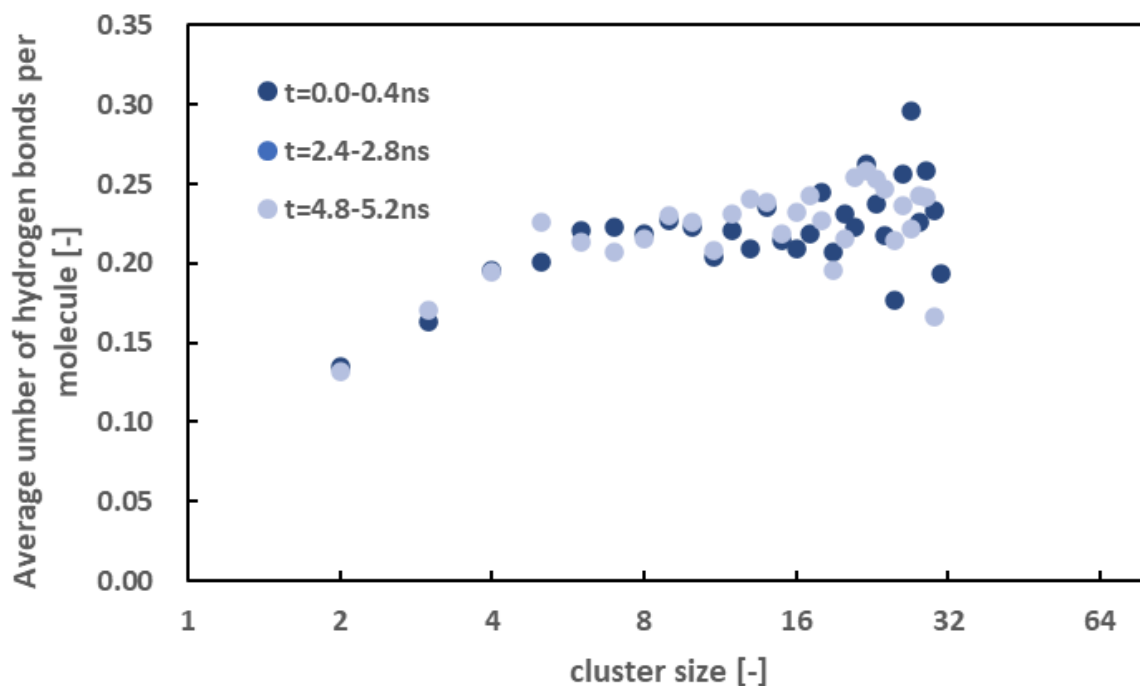

b)

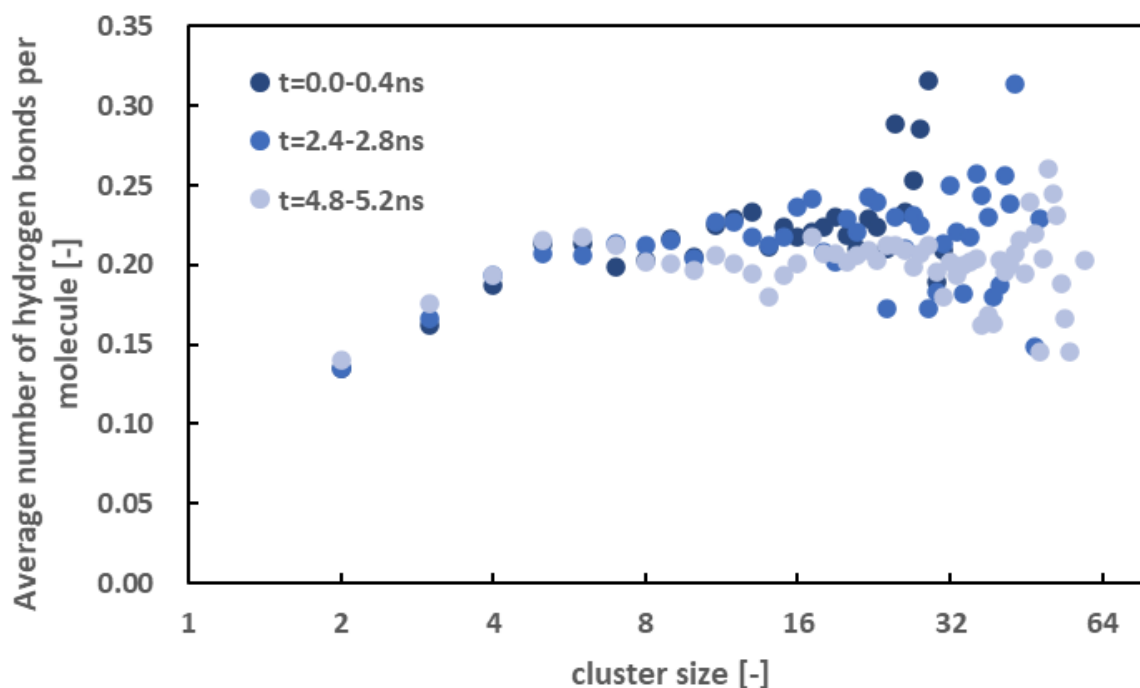

Fig. S7 Average number of hydrogen bonds per molecule vs. cluster size at a)  $C = 2.94$ , b)  $C = 3.72$  mol kg<sup>-1</sup> of glycine aqueous solution.
